# Supplementary material for: The effectiveness of substance use interventions for homeless and vulnerably housed persons: A systematic review of systematic reviews on supervised consumption facilities, managed alcohol programs, and pharmacological agents for opioid use disorder
Source: PubMed Central journal article supplement (PMC6964917; doi:10.1371/journal.pone.0227298), 2020-01-16
Supplement: pone.0227298.s003.pdf [file pone.0227298.s003.pdf]

## Appendix III: Search Strategy

Database: Embase Classic+Embase <1947 to 2018 July 05>, Ovid MEDLINE(R) ALL <1946 to July 05, 2018>, PsycINFO <1806 to July Week 1 2018>, Joanna Briggs Institute EBP Database - <Current to June 27, 2018>, EBM Reviews - Cochrane Database of Systematic Reviews <2005 to July 5, 2018>, EBM Reviews - Database of Abstracts of Reviews of Effects <1st Quarter 2016>

### Search Strategy:

- 
- 1 drug users/ (106193)
  - 2 exp \*substance-related disorders/ (336853)
  - 3 exp \*alcohol-related disorders/ (159374)
  - 4 alcoholics/ (127046)
  - 5 exp \*opioid-related disorders/ (25902)
  - 6 exp \*substance withdrawal syndrome/ (28023)
  - 7 ((Illicit or injection or intravenous or iv or parenteral) adj2 drug use\$.t,k.f. (11304)
  - 8 ((Illicit or injection or intravenous or iv or parenteral) adj2 drug use\$.ab. (37987)
  - 9 (pwud or pwid).tw,k.f. (3324)
  - 10 or/1-9 (518390)
  - 11 substance abuse treatment centers/ (13062)
  - 12 needle-exchange programs/ (28591)
  - 13 harm reduction/ (10064)
  - 14 (supervised adj2 (consumption or drug or injection or treatment)).tw,k.f. (1789)
  - 15 ((needle? or syringe?) adj2 exchange).tw,k.f. (4166)
  - 16 or/11-15 (54427)
  - 17 alcohol drinking/pc (5135)
  - 18 \*alcoholism/rh, th (17940)

- 19 (managed adj2 (alcohol or drinking)).tw,kf. (99)
- 20 (supervised adj2 (alcohol or drinking)).tw,kf. (39)
- 21 (alcohol\$ and (manag\$ or reduc\$ or treat\$) and (abus\$ or delirium or withdrawal)).tw,kf. (62932)
- 22 ((alcohol or ethanol) adj2 (adminst\$ or administer\$ or intravenous or iv or i v or prophyl\$ or prescri\$ or protocol? or provid\$ or provision)).tw,kf. (12883)
- 23 or/17-22 (94502)
- 24 exp \*opioid-related disorders/dt, pc, rh, th (12196)
- 25 substance abuse, intravenous/dt, pc, rh, th (2856)
- 26 narcotics/rh, tu (3559)
- 27 hydromorphone/ad, tu (1081)
- 28 methadone/ad, tu (9046)
- 29 naloxone/ad, tu (4867)
- 30 naltrexone/ad, tu (3467)
- 31 (((buprenorphine or diacetylmorphine or heroin or hydromorphone or methadone or morphine or opiate? or opioid\$) adj (main\$ or replace\$ or substitut\$)) and (dependen\$ or management or therap\$ or treatment\$)).i,k.f. (5732)
- 32 (((buprenorphine or diacetylmorphine or heroin or hydromorphone or methadone or morphine or opiate? or opioid\$) adj (main\$ or replace\$ or substitut\$)) and (dependen\$ or management or therap\$ or treatment\$)).ab. (14648)
- 33 or/24-32 (40355)
- 34 exp program evaluation/ (105081)
- 35 ((effectiveness or improve\$ or initiative? or prevent\$ or program\$ or reduc\$ or strateg\$ or treatment?) adj3 (alcohol\$ or addict\$ or cocaine or drug? or heroin or marijuana or narcotic\$ or opioid?)).i,k.f. (88090)
- 36 ((effectiveness or improve\$ or initiative? or prevent\$ or program\$ or reduc\$ or strateg\$ or treatment?) adj3 (alcohol\$ or addict\$ or cocaine or drug? or heroin or marijuana or narcotic\$ or opioid?)).ab. (427373)
- 37 or/34-36 (583066)
- 38 ((overview\$ or review or synthesis or summary or Cochrane or analysis) and (reviews or meta-analyses or articles or umbrella)).i. (8903)
- 39 ((overview\$ or reviews) and (systematic or cochrane)).i. (8943)
- 40 (reviews adj2 meta).ab. (13288)

- 41 (reviews adj2 (published or quality or included or summar\$)).ab. (13247)
- 42 (cochrane review\* or systematic review\*).ab. (214614)
- 43 (evidence and (reviews or meta-analyses)).ti. (1697)
- 44 or/39-43 (227862)
- 45 38 or 44 (231624)
- 46 animals/ not (humans/ and animals/) (5795904)
- 47 45 not 46 (230699)
- 48 10 and (16 or 23 or 33) and 37 and 47 (428)
- 49 remove duplicates from 48 (287)
