# Supplementary material for: The effectiveness of substance use interventions for homeless and vulnerably housed persons: A systematic review of systematic reviews on supervised consumption facilities, managed alcohol programs, and pharmacological agents for opioid use disorder
Source: PubMed Central journal article supplement (PMC6964917; doi:10.1371/journal.pone.0227298), 2020-01-16
Supplement: pone.0227298.s005.pdf [file pone.0227298.s005.pdf]

## Appendix V: Table of Excluded Studies

| Citation                                                                                                                                                                                                                                                                                                    | Reason for Exclusion                   |
|-------------------------------------------------------------------------------------------------------------------------------------------------------------------------------------------------------------------------------------------------------------------------------------------------------------|----------------------------------------|
| Amato, L., Davoli, M., Perucci, C. A., Ferri, M., Faggiano, F., & Mattick, R. P. (2005). An overview of systematic reviews of the effectiveness of opiate maintenance therapies: available evidence to inform clinical practice and research. <i>Journal of substance abuse treatment</i> , 28(4), 321-329. | Wrong study design (review of reviews) |
| Amato, L., Davoli, M., Ferri, M., Gowing, L., & Perucci, C. A. (2004). Effectiveness of interventions on opiate withdrawal treatment: an overview of systematic reviews. <i>Drug and alcohol dependence</i> , 73(3), 219-226.                                                                               | Wrong intervention (withdrawal)        |
| Bart, G. (2012). Maintenance medication for opiate addiction: the foundation of recovery. <i>Journal of addictive diseases</i> , 31(3), 207-225.                                                                                                                                                            | Wrong study design                     |
| Canadian Nurses Association (2011). Harm reduction and currently illegal drugs: Implications for nursing policy, practice, education and research. Discussion Paper.                                                                                                                                        | Wrong study design                     |
| Canadian Nurses Association (2017). Harm reduction & illicit substance use: Implications for Nursing.                                                                                                                                                                                                       | Wrong study design                     |
| Chimbar, L., & Moleta, Y. (2018). Naloxone Effectiveness: A Systematic Review. <i>Journal of addictions nursing</i> , 29(3), 167-171.                                                                                                                                                                       | Wrong study design, intervention       |
| Crowley, D., & Van Hout, M. C. (2017). Effectiveness of pharmacotherapies in increasing treatment retention and reducing opioid overdose death in individuals recently released from prison: a systematic review. <i>Heroin Addiction and Related Clinical Problems</i> , 19(2).                            | Wrong population                       |
| Davids, E., & Gastpar, M. (2004). Buprenorphine in the treatment of opioid dependence. <i>European Neuropsychopharmacology</i> , 14(3), 209-216.                                                                                                                                                            | Wrong outcomes                         |
| Dennis, B., Bawor, M., Naji, L., Boner, A., Roshanov, P., Paul, J., ... & Plater, C. (2018). 48 Trials and tribulations of establishing treatment effectiveness in addiction research. <i>Bmj Evidence-based Medicine</i> , 23(Suppl_1).                                                                    | Wrong study design                     |
| Faggiano, F., Versino, E., Vigna-Taglianti, F., & Lemma, P. (2003). Methadone maintenance at different dosages for opioid dependence. <i>The Cochrane Library</i> , Issue 3.                                                                                                                                | Wrong intervention (dosing)            |
| Gowing, Linda ; Farrell, Michael ; Ali, Robert ; White, Jason M. Alpha <sub>2</sub> -adrenergic agonists for the management of opioid withdrawal <i>The Cochrane database of systematic reviews</i> , 03 May 2016 (5), pp.CD002024                                                                          | Wrong intervention (withdrawal)        |
| Hedrich, D., Alves, P., Farrell, M., Stöver, H., Møller, L., & Mayet, S. (2012). The effectiveness of opioid maintenance treatment in prison settings: a systematic review. <i>Addiction</i> , 107(3), 501-517.                                                                                             | Wrong population                       |
| Holloway, K. R., Bennett, T. H., & Farrington, D. P. (2006). The effectiveness of drug treatment programs in reducing criminal behavior: A meta-analysis. <i>Psicothema</i> , 18(3), 620-629.                                                                                                               | Wrong outcomes                         |
| Jones, J. L., Mateus, C. F., Malcolm, R. J., Brady, K. T., & Back, S. E. (2018). Efficacy of ketamine in the treatment of substance use disorders: a systematic review. <i>Frontiers in Psychiatry</i> , 9.                                                                                                 | Wrong intervention                     |

|                                                                                                                                                                                                                                                                                  |                            |
|----------------------------------------------------------------------------------------------------------------------------------------------------------------------------------------------------------------------------------------------------------------------------------|----------------------------|
| Larney, S. (2010). Does opioid substitution treatment in prisons reduce injecting-related HIV risk behaviours? A systematic review. <i>Addiction</i> , 105(2), 216-223.                                                                                                          | Wrong population           |
| Maglione, M. A., Raaen, L., Chen, C., Azhar, G., Shahidinia, N., Shen, M., ... & Hempel, S. (2018). Effects of medication assisted treatment (MAT) for opioid use disorder on functional outcomes: A systematic review. <i>Journal of substance abuse treatment</i> , 89, 28-51. | Wrong outcomes             |
| Mathew C, Mendonca O, Abdalla T, Stergiopoulos V, Bloch G,...Pottie K (2018). Interventions to improve physical health, mental health and social outcomes for homeless and vulnerably housed populations. <i>The Cochrane Collaboration</i> .                                    | Wrong study design         |
| Mauger, S., Fraser, R., & Gill, K. (2014). Utilizing buprenorphine-naloxone to treat illicit and prescription-opioid dependence. <i>Neuropsychiatric disease and treatment</i> , 10, 587.                                                                                        | Wrong study design         |
| May, T., Bennett, T., & Holloway, K. (2018). The impact of medically supervised injection centres on drug-related harms: A meta-analysis. <i>International Journal of Drug Policy</i> , 59, 98-107.                                                                              | Retracted from publication |
| McAuley, A., Aucott, L., & Matheson, C. (2015). Exploring the life-saving potential of naloxone: a systematic review and descriptive meta-analysis of take home naloxone (THN) programmes for opioid users. <i>International Journal of Drug Policy</i> , 26(12), 1183-1188.     | Wrong outcomes             |
| McNeil, R., & Small, W. (2014). 'Safer environment interventions': A qualitative synthesis of the experiences and perceptions of people who inject drugs. <i>Social Science &amp; Medicine</i> , 106, 151-158.                                                                   | Wrong outcomes             |
| Nielsen, S., MacDonald, T., & Johnson, J. L. (2018). Identifying and treating codeine dependence: a systematic review. <i>Medical Journal of Australia</i> , 208(10), 451-461.                                                                                                   | Wrong outcomes             |
| Poulin, C. (2006). Harm reduction policies and programs for youth. <i>Canadian Centre on Substance Abuse</i> .                                                                                                                                                                   | Wrong study design         |
| Pujol, C. N., Paasche, C., Laprevote, V., Trojak, B., Vidailhet, P., Bacon, E., & Lalanne, L. (2017). Cognitive effects of labeled addictolytic medications. <i>Progress in Neuro-Psychopharmacology and Biological Psychiatry</i> .                                             | Wrong intervention         |
| Rahimi-Movaghar, A., Amin-Esmaeili, M., Hefazi, M., & Yousefi-Nooraie, R. (2013). Pharmacological therapies for maintenance treatments of opium dependence. <i>The Cochrane database of systematic reviews</i> , (1), CD007775-CD007775.                                         | Wrong intervention         |
| Ramsperger E & Ramage K. (2017). A selective literature review on managed alcohol programs and indigenous healing methodologies. <i>Aboriginal Standing Committee on Housing and Homelessness</i>                                                                                | Wrong population           |
| Rapid Response Service. Rapid Response: What is the effectiveness of supervised injection services? Toronto, ON: Ontario HIV Treatment Network; May 2014.                                                                                                                        | Wrong study design         |
| Rayburn, W. F., & Bogenschutz, M. P. (2004). Pharmacotherapy for pregnant women with addictions. <i>American Journal of Obstetrics and Gynecology</i> , 191(6), 1885-1897.                                                                                                       | Wrong study design         |
| Reed, M. (2008). Wet Shelters: The benefits and risks associated with alcohol-administering homeless shelters. <i>Ministry of Labour and Citizens Services, British Columbia, Canada</i> .                                                                                       | Wrong study design         |
| Snooks, H., Russell, D., Brown, C., Nair, A., Moore, C., Lewis, A., ... & Griffith-Noble, F. (2011). 015                                                                                                                                                                         | Wrong study                |

|                                                                                                                                                                                                                                              |                           |
|----------------------------------------------------------------------------------------------------------------------------------------------------------------------------------------------------------------------------------------------|---------------------------|
| <p>How can we prevent overdoses and what works? a systematic review of interventions for non fatal poisonings. <i>Emergency Medicine Journal</i>, 28(3), e1-e1.</p>                                                                          | <p>design</p>             |
| <p>Sokol, R., LaVertu, A. E., Morrill, D., Albanese, C., &amp; Schuman-Olivier, Z. (2018). Group-based treatment of opioid use disorder with buprenorphine: A systematic review. <i>Journal of substance abuse treatment</i>, 84, 78-87.</p> | <p>Wrong intervention</p> |
| <p>Tsai, L. C., &amp; Doan, T. J. (2016). Breastfeeding among mothers on opioid maintenance treatment a literature review. <i>Journal of Human Lactation</i>, 32(3), 521-529.</p>                                                            | <p>Wrong outcomes</p>     |
