# Supplementary material for: The effectiveness of substance use interventions for homeless and vulnerably housed persons: A systematic review of systematic reviews on supervised consumption facilities, managed alcohol programs, and pharmacological agents for opioid use disorder
Source: PLoS One. 2020 Jan 16;15(1):e0227298. doi: 10.1371/journal.pone.0227298 (PMC6964917; doi:10.1371/journal.pone.0227298)
Supplement: S2 File — (PDF) [file pone.0227298.s002.pdf]

## Appendix II: Inclusion Criteria

| Inclusion Criteria                                     | Definitions                                                                                                                                                                                                                                                                                                                                                                                                                                                                          |                                                                                                                                                                                                                                                                                                                                                               |
|--------------------------------------------------------|--------------------------------------------------------------------------------------------------------------------------------------------------------------------------------------------------------------------------------------------------------------------------------------------------------------------------------------------------------------------------------------------------------------------------------------------------------------------------------------|---------------------------------------------------------------------------------------------------------------------------------------------------------------------------------------------------------------------------------------------------------------------------------------------------------------------------------------------------------------|
| Population                                             | People experiencing homelessness and vulnerable housing.                                                                                                                                                                                                                                                                                                                                                                                                                             |                                                                                                                                                                                                                                                                                                                                                               |
| Interventions                                          | Supervised consumption facilities                                                                                                                                                                                                                                                                                                                                                                                                                                                    | Legally sanctioned facilities where people who use substances can consume pre-obtained substances under supervision (Drug Policy Alliance, 2018). There exists various terminologies for these facilities, including: supervised injection facilities (SIF), supervised consumption sites (SCS), medically supervised injection centres (MCIS), among others. |
|                                                        | Managed alcohol programs                                                                                                                                                                                                                                                                                                                                                                                                                                                             | Shelter, medical assistance, social services and the provision of regulated alcohol to help residents cope with severe alcohol use disorder (Shepherds of Good Hope Foundation, n.d.)                                                                                                                                                                         |
|                                                        | Pharmacological interventions for opioid use disorder                                                                                                                                                                                                                                                                                                                                                                                                                                | Opioid therapy medications including methadone, buprenorphine, diacetylmorphine, levo- $\alpha$ -acetylmethadol (LAAM) and naltrexone.                                                                                                                                                                                                                        |
|                                                        | Pharmacologic agents for reversal of opioid overdose                                                                                                                                                                                                                                                                                                                                                                                                                                 | Opioid antagonist administered intravenously or intranasally, e.g. naloxone.                                                                                                                                                                                                                                                                                  |
| Comparison                                             | No intervention, standard intervention, alternative intervention, treatment as usual.                                                                                                                                                                                                                                                                                                                                                                                                |                                                                                                                                                                                                                                                                                                                                                               |
| Outcomes                                               | Mortality, morbidity, substance use, mental health, access to care, retention in treatment                                                                                                                                                                                                                                                                                                                                                                                           |                                                                                                                                                                                                                                                                                                                                                               |
| Study design                                           | Systematic review. Exclude all other study designs.                                                                                                                                                                                                                                                                                                                                                                                                                                  |                                                                                                                                                                                                                                                                                                                                                               |
| Exclusion Criteria                                     | Justifications                                                                                                                                                                                                                                                                                                                                                                                                                                                                       |                                                                                                                                                                                                                                                                                                                                                               |
| Reviews that focus on low- and middle-income countries | <p>Due to the variability in access to resources and supports in comparison to that in a high-income country vary greatly. We feel that the settings are different and should be synthesized separately.</p> <p>The analysis of the interventions tailored to this population will be covered by an Indigenous research group.</p> <p>Not generalizable to the non-incarcerated homeless population.</p> <p>Abstinence-based approaches are outside of the scope of this review.</p> |                                                                                                                                                                                                                                                                                                                                                               |
| Reviews that focus on Indigenous populations           |                                                                                                                                                                                                                                                                                                                                                                                                                                                                                      |                                                                                                                                                                                                                                                                                                                                                               |
| Reviews which focus on incarcerated populations        |                                                                                                                                                                                                                                                                                                                                                                                                                                                                                      |                                                                                                                                                                                                                                                                                                                                                               |
| Reviews which exclusively report on                    |                                                                                                                                                                                                                                                                                                                                                                                                                                                                                      |                                                                                                                                                                                                                                                                                                                                                               |

|                                     |  |
|-------------------------------------|--|
| interventions for<br>detoxification |  |
|-------------------------------------|--|
